# Supplementary material for: Wheel-shaped copper containing polyoxotungstate as an efficient catalyst in the three-component synthesis of 1,2,3-triazoles
Source: Royal Society of Chemistry journal article supplement (doi:10.1039/c5ra25116h), 2016-01-01
Supplement: c5ra25116h1.pdf [file c5ra25116h1.pdf]

# Wheel-Shaped Copper Containing Polyoxotungstate as an Efficient Catalyst in Three-Component Synthesis of 1,2,3-Triazoles

Fariba Jalilian, Bahram Yadollahi\*, Shahram Tangestaninejad, Hadi Amiri Rudbari

Department of Chemistry, University of Isfahan, Isfahan 81746-73441, Iran

## Supporting Information

**1. General Methods and Materials:** All POMs catalyst were prepared according to the literature<sup>1-5</sup>. All common laboratory chemicals were reagent grade, purchased from commercial sources and used without further purification. Elemental analyses were carried out on a Perkin-Elmer 7300 DV and Leco, CHNS-932 elemental analyzer. Infrared spectra (KBr pellets) were recorded on a JASCO, FT/IR-6300 instrument. <sup>1</sup>H and <sup>13</sup>C NMR were recorded on a Bruker (400 and 100 MHz; 296 K) using CDCl<sub>3</sub> as the solvent with TMS as an internal reference. UV-vis spectra were recorded on JASCO V-670 UV-vis spectrophotometer (190-2700 nm). X-ray diffraction data (XRD) were obtained on a D8 Advanced Bruker using Cu K $\alpha$  radiation ( $2\theta = 10-80^\circ$ ).

## 2. Synthesis methods of Cu containing POMs

### 2.1. Synthesis of Na<sub>4</sub>K<sub>5</sub>[K<sub>3</sub>Cu<sub>3</sub>(NO<sub>3</sub>)(A- $\alpha$ -PW<sub>9</sub>O<sub>34</sub>)<sub>2</sub>]<sup>1</sup>

Na<sub>2</sub>WO<sub>4</sub>·2H<sub>2</sub>O (5 g, 15.2 mmol) and Na<sub>2</sub>HPO<sub>4</sub> (0.24 g, 1.7 mmol) were dissolved in 100 mL H<sub>2</sub>O then (0.31 g, 1.01 mmol) Cu(NO<sub>3</sub>)<sub>2</sub>·6H<sub>2</sub>O was added. The pH was adjusted to 7.5 by drop wise addition of 6 M HCl, and a green solution formed. The produced green solution heated at 90 °C for 1 h and then allowed to cool to room temperature. KCl (0.6 g, 8.0 mmol) was added, and the

---

\*Corresponding Author. Tel: +98-31-37934934; fax: +98-31-36689732; e-mail: [yadollahi@chem.ui.ac.ir](mailto:yadollahi@chem.ui.ac.ir), [yadollahi.b@gmail.com](mailto:yadollahi.b@gmail.com)

solution was kept at room temperature. After several weeks, dark green crystals were formed (yield 70% based on W). IR (KBr): 1099, 1063, 1045, 945, 873, 810, 743, 641 ( $\text{cm}^{-1}$ ).

## 2.2. Synthesis of $\text{K}_{28}\text{Li}_5[\text{H}_7\text{P}_8\text{W}_{48}\text{O}_{184}]\cdot 92\text{H}_2\text{O}^2$

60 g (1 mol) of glacial acetic acid, 21 g (0.5 mol) of lithium hydroxide, 21 g (0.5 mol) of lithium chloride, and 28 g of  $\text{K}_{12}[\text{H}_2\text{P}_2\text{W}_{12}\text{O}_{48}]\cdot 24\text{H}_2\text{O}$  were successively dissolved in 950 mL of water. The solution was left in a closed flask. After 1 day, white needles appeared and the crystallization has been continued for several days. After one week, the crystals were collected by suction filtration on a coarse frit and air dried for 3 days (Yield: 33%).

The P-O bands are at 1140, 1090, and 1020  $\text{cm}^{-1}$  (KBr) in the IR spectrum.

## 2.3. Synthesis of $\text{K}_7\text{Na}_3[\text{Cu}_4(\text{PW}_9\text{O}_{34})_2]^3$

$\text{CuCl}_2\cdot 2\text{H}_2\text{O}$  (0.62 g, 3.6 mmol) was dissolved in 12 mL of water. To this solution, 5.0 g (1.8 mmol) of solid  $\Delta\text{-PW}_9$  was added with stirring until all the  $\Delta\text{-PW}_9$  was dissolved. Addition of KCl (0.66 g, 8.8 mmol) to this light green solution, resulted in the precipitation of a pale green product. This product was stirred for 10 min and then heated under hot water (60 °C) or on a steam bath for brief periods (1-5 min) until the bulk of the precipitated solid had redissolved. The slightly cloudy solution was centrifuged for about 5 min to remove the fine blue suspension. The clear light green supernatant was removed and allowed to crystallize at room temperature. Pale green crystalline cubes began to form immediately and continued to crystallize for 6-12 h. The yield was (27%).

IR (KBr):  $\bar{\nu}$  = 1085, 1033, 975, 947, 932, 865, 821  $\text{cm}^{-1}$ .

## 2.4. Synthesis of $\text{K}_4[\gamma\text{-H}_2\text{SiW}_{10}\text{O}_{36}\text{Cu}_2(\mu\text{-1,1-N}_3)_2]^4$

$\text{CuCl}_2$  (0.67 mmol, two equivalents with respect to  $[\gamma\text{-SiW}_{10}\text{O}_{36}]^{8-}$ ) in water (20 mL) was added to a suspension of  $\text{K}_8[\gamma\text{-SiW}_{10}\text{O}_{36}]\cdot 12\text{H}_2\text{O}$  (0.335 mmol) in water (20 mL). After 1 min,  $\text{NaN}_3$  (1.75 mmol, 5.2 equivalents with respect to  $[\gamma\text{-SiW}_{10}\text{O}_{36}]^{8-}$ ) in water (20 mL) was added, followed

by the immediate addition of KCl (26.20 mmol) in water (20 mL). The pH of the mixture was adjusted to 6.0 with 1.0 M aqueous HNO<sub>3</sub> solution, followed by stirring for 20 min at room temperature. The green precipitate of **1** was collected by filtration and washed with an excess amount of water (0.78 g, 64% yield based on K<sub>8</sub>[ $\gamma$ -SiW<sub>10</sub>O<sub>36</sub>] $\cdot$ 12H<sub>2</sub>O).

In the IR spectrum a strong band at 2077 cm<sup>-1</sup> assigned to the asymmetric stretching vibration of the azido ligands. IR (KBr):  $\bar{\nu}$  = 2077, 995, 958, 914, 893, 874, 809, 692, 550, 512, 470, 459 cm<sup>-1</sup>.

## 2.5. Synthesis of $\beta$ -K<sub>10</sub>[SiW<sub>9</sub>O<sub>37</sub>{(Cu(H<sub>2</sub>O))<sub>3</sub>}]<sup>5</sup>

To a solution of copper(II) acetate (3.0 g, 15 mmol) in 0.5 mol dm<sup>-3</sup> sodium acetate (pH 6.5, 150 cm<sup>3</sup>) was added  $\beta$ -SiW<sub>9</sub> (12.8 g, 4.5 mmol). An initially formed blue precipitate redissolved to form a green solution. After cation-exchange treatment, a solution of KCl (4 g) in water (12 cm<sup>3</sup>) was added. A green oil was formed that upon stirring changed to a green solid. The latter was recrystallized from water to yield green crystals (7.8 g). The main vibrational frequencies in IR (KBr):  $\bar{\nu}$  = 997, 957, 897, 788, 660, 539, 438 cm<sup>-1</sup>.

## 2.6. Synthesis of K<sub>12</sub>Li<sub>13</sub>[Cu<sub>20</sub>Cl(OH)<sub>24</sub>(H<sub>2</sub>O)<sub>12</sub>(P<sub>8</sub>W<sub>48</sub>O<sub>184</sub>)] $\cdot$ 22H<sub>2</sub>O (Cu<sub>20</sub> POM)<sup>6</sup>

A sample of CuCl<sub>2</sub> $\cdot$ 2H<sub>2</sub>O (0.60 mmol) was dissolved in a 1M LiCH<sub>3</sub>COO buffer solution (20 mL) at pH 6.0, then K<sub>28</sub>Li<sub>5</sub>[H<sub>7</sub>P<sub>8</sub>W<sub>48</sub>O<sub>184</sub>] $\cdot$ 92H<sub>2</sub>O (0.025 mmol) was added. This solution was heated to 80 °C for 1 h and after cooling to room temperature it was filtered. The filtrate was allowed to evaporate at room temperature. After 1–2 days a blue crystalline product started to appear. Evaporation was allowed to continue until the solution level had approached the solid product, which was then collected by filtration and air-dried. Yield: 30%. IR:  $\bar{\nu}$  = 1136(sh), 1121(s), 1080(s), 1017(m), 979(sh), 950(sh), 932(s), 913(sh), 830(sh), 753(s), 683(s), 570(sh), 525(w) cm<sup>-1</sup>.

Elemental analysis data for  $\text{K}_{12}\text{Li}_{13}[\text{Cu}_{20}\text{Cl}(\text{OH})_{24}(\text{H}_2\text{O})_{12}(\text{P}_8\text{W}_{48}\text{O}_{184})]$ : Calcd.: K: 3.2, Li: 0.6, W: 59.2, Cu: 8.5, P: 1.7; found: K: 3.35, Li: 0.71, W: 60.1, Cu: 8.3, P: 1.6 (Figures S1-S5).

### 3. General procedure for the three-component synthesis of 1,2,3-triazoles

A 10 mL glass vessel was charged with  $\text{Cu}_{20}\text{POM}$  catalyst (10  $\mu\text{mol}$ ), sodium ascorbate (10 mol %), an alkyne (0.5 mmol), sodium azide (0.5 mmol), and an alkyl halide (0.5 mmol) in a mixture of water and *tert*-butyl alcohol (2:1; 3 mL). The reaction vessel was stirred at room temperature for 2–4 h and the color of reaction mixture was changed from blue to yellow during the progress of reaction. After completion of the reaction, colorless triazole product was precipitated (Figures S6–S12). The products were quantitatively recovered by simple extraction with ethyl acetate ( $3 \times 2$  mL). The organic layer was separated, dried over  $\text{MgSO}_4$  and concentrated under reduced pressure to give the corresponding 1,2,3-triazole. Purification of the obtained triazoles were accomplished by a recrystallization process ( $\text{EtOAc}$ :*n*-hexane). All of the products were known and characterized by comparison their spectral data with authentic samples.

The reaction with benzyl bromide and phenyl acetylene was used for investigation the recyclability. Upon the completion of the reaction, the mixture was diluted with  $\text{H}_2\text{O}$ /ethyl acetate (1:1.6 mL), then the aqueous phase was separated and this operation was repeated three times. After removing the solvent by evaporation and drying the catalyst, the cycloaddition reaction was performed with the recovered catalyst. This catalyst could be reused three times without any significant loss of activity.

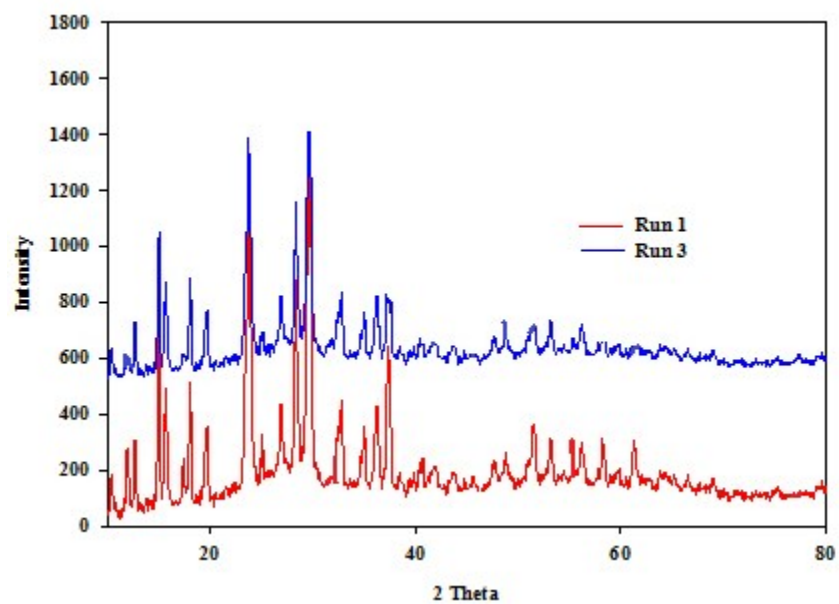

**Figure S1.** The XRD pattern of Cu<sub>20</sub> POM in Run 1(red) and recovered in run 3 (blue).

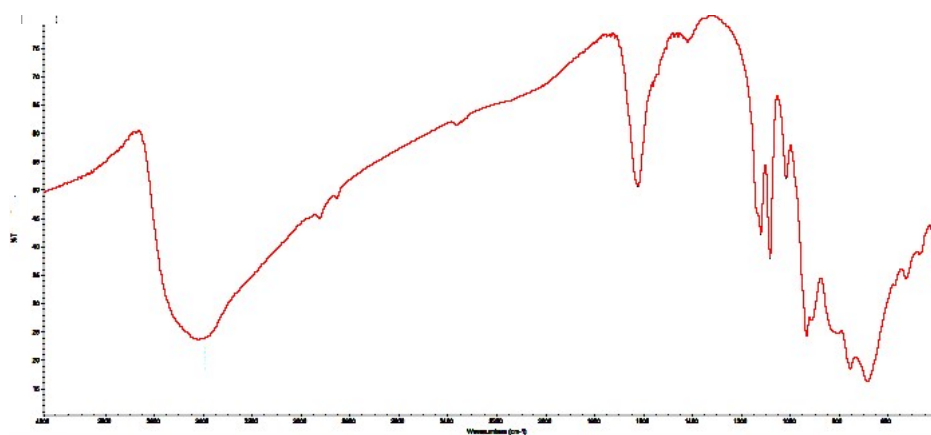

**Figure S2.** FT-IR Spectrum of Cu<sub>20</sub> POM

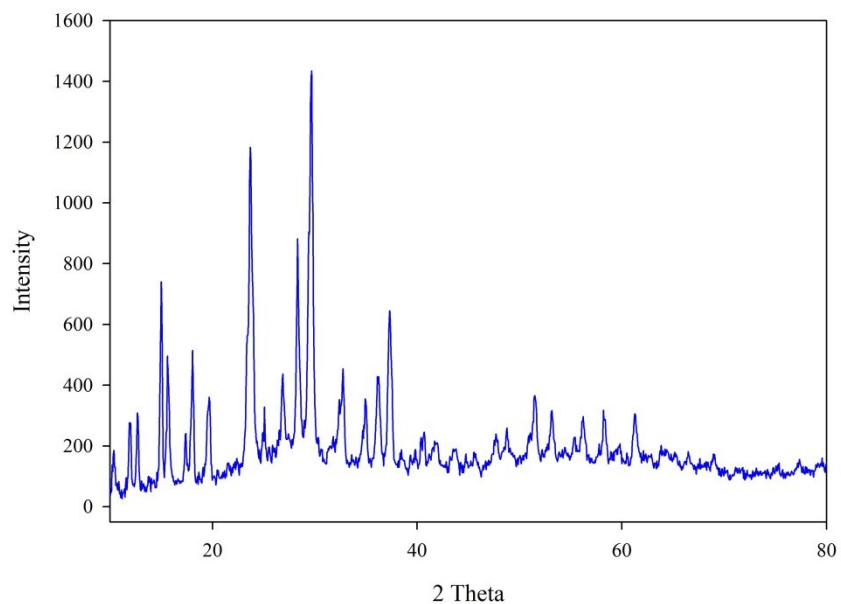

**Figure S3.** XRD pattern of Cu<sub>20</sub> POM

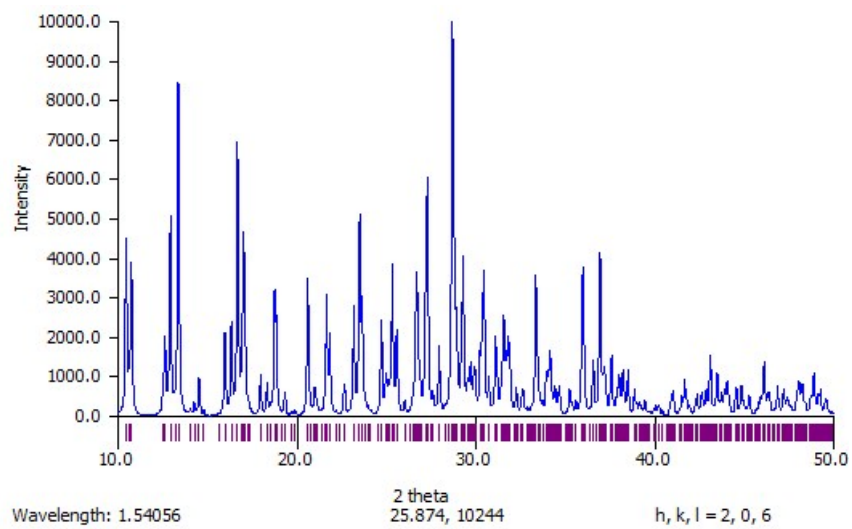

**Figure S4.** Simulated XRD pattern of Cu<sub>20</sub> POM

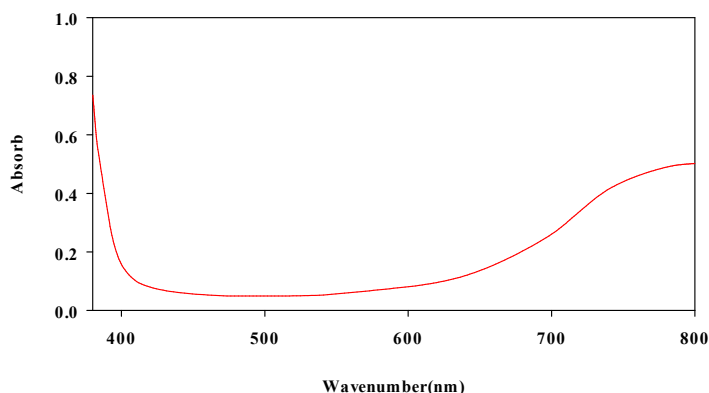

**Figure S5.** UV-vis spectrum of Cu<sub>20</sub> POM solution

**<sup>1</sup>H and <sup>13</sup>C NMR data of isolated compounds:** NMR data are in agreement with the literature references<sup>7–10</sup>.

**1-Benzyl-4-phenyl-1H-1,2,3-triazole:** Colorless solid; <sup>1</sup>H NMR (400 MHz, CDCl<sub>3</sub>): δ: 7.80 (d, 2H), 7.65 (s, 1H), 7.31–7.40 (m, 8H), 5.57 (s, 2H). <sup>13</sup>C NMR (100 MHz, CDCl<sub>3</sub>) δ: 54.41, 119.48, 125.65, 128.10, 128.09, 128.74, 129.08, 134.59, 148.15.

**1-Benzyl-4-propyl-1H-1,2,3-triazole:** Light yellow liquid oil; <sup>1</sup>H NMR (400 MHz, CDCl<sub>3</sub>): δ: 0.94–1.01 (t, 3H), 1.63–1.77 (m, 2H), 2.64–2.75 (t, 2H), 5.53 (s, 2H), 7.24–7.30 (m, 2H, ArH), 7.33–7.45 (m, 4H, ArH). <sup>13</sup>C NMR (100 MHz, CDCl<sub>3</sub>) δ: 13.47, 22.34, 27.36, 53.59, 120.51, 127.60, 128.23, 128.69, 134.77, 148.26.

**1-(2-Chlorobenzyl)-4-phenyl-1H-1,2,3-triazole:** White solid; <sup>1</sup>H NMR (400 MHz, CDCl<sub>3</sub>): δ: 5.75 (s, 2H), 7.24–7.39 (m, 4H, ArH), 7.40–7.50 (m, 3H, ArH), 7.81 (s, 1H, ArH), 7.82–7.89 (d, 2H, ArH). <sup>13</sup>C NMR (100 MHz, CDCl<sub>3</sub>) δ: 52.06, 119.88, 123.30, 125.91, 127.72, 128.77, 128.82, 129.06, 131.05, 130.27, 132.28, 133.01, 148.17.

**1-(4-Nitrobenzyl)-4-phenyl-1H-1,2,3-triazole:** Yellowish solid, <sup>1</sup>H NMR (400 MHz, CDCl<sub>3</sub>): δ: 5.73 (s, 2H), 7.34–7.41 (t, 1H, ArH), 7.41–7.52 (m, 4H, ArH), 7.79 (s, 1H, ArH), 7.81–7.89 (d,

2H, ArH, ), 8.20–8.32 (d, 2H, ArH).  $^{13}\text{C}$  NMR ( $\text{CDCl}_3$ )  $\delta$ : 13.9, 22.4, 25.5, 28.8, 29.2, 31.4, 52.8, 120.7, 124.0, 124.1, 127.7, 128.3, 142.0, 147.8, 149.4.

**1-(4-Bromobenzyl)-4-hexyl-1H-1,2,3-triazole:** White solid,  $^1\text{H}$  NMR (400 MHz,  $\text{CDCl}_3$ ):  $\delta$ : 7.42–7.40 (d,  $J = 8.42$  Hz 2H), 7.12 (s, 1H), 7.005 (m, 2H), 5.36 (s, 2H), 2.62–2.38 (t, 2H), 1.59–1.40 (m, 2H), 1.25–1.15 (m, 6H), 0.80–0.77 (t, 3H).  $^{13}\text{C}$  NMR ( $\text{CDCl}_3$ )  $\delta$ : 149.1, 133.9, 132.1, 129.4, 128.7, 122.6, 120.4, 53.1, 31.4, 29.2, 28.8, 25.6, 22.4, 13.9 ppm.

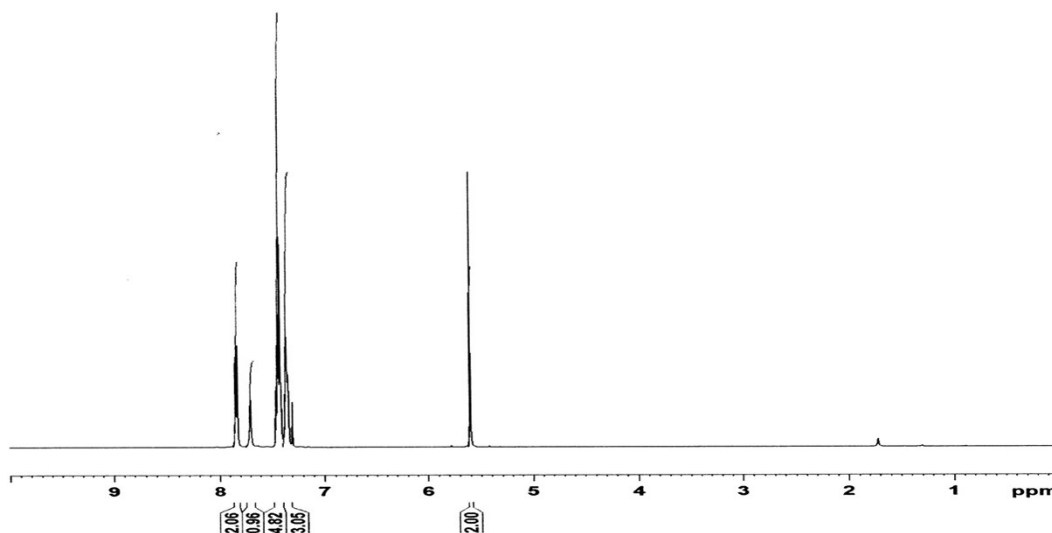

**Figure S6.**  $^1\text{H}$  NMR spectrum of 1-benzyl-4-phenyl-1H-1,2,3-triazole

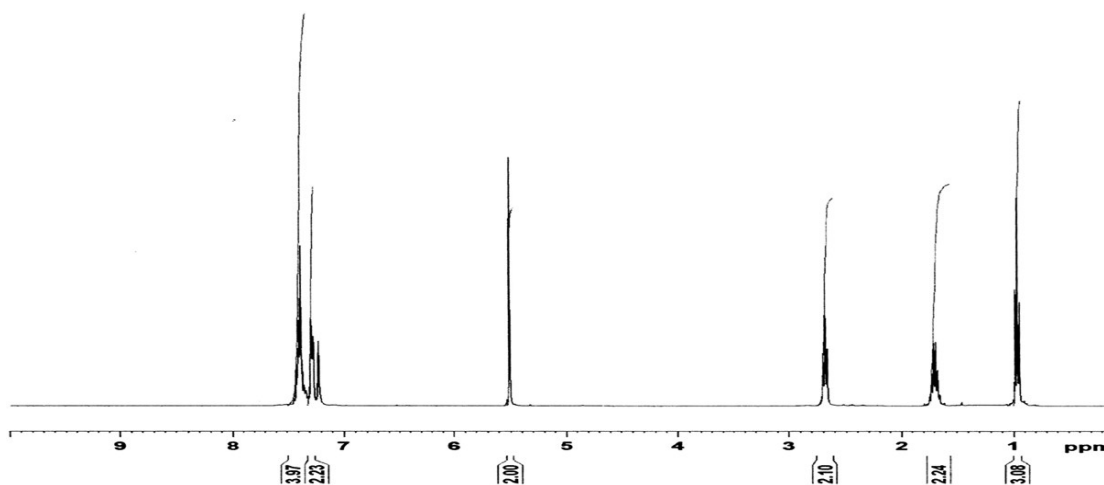

**Figure S7.**  $^1\text{H}$  NMR spectrum of 1-Benzyl-4-propyl-1H-1,2,3-triazole

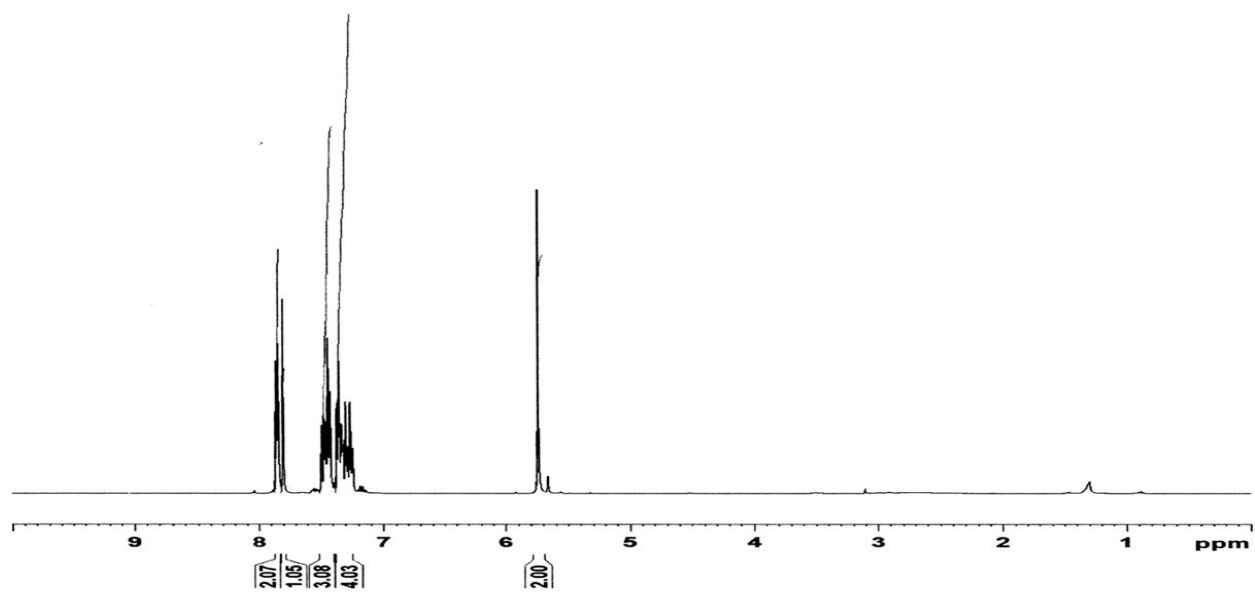

**Figure S8.** 1-(2-Chlorobenzyl)-4-phenyl-1H-1,2,3-triazole

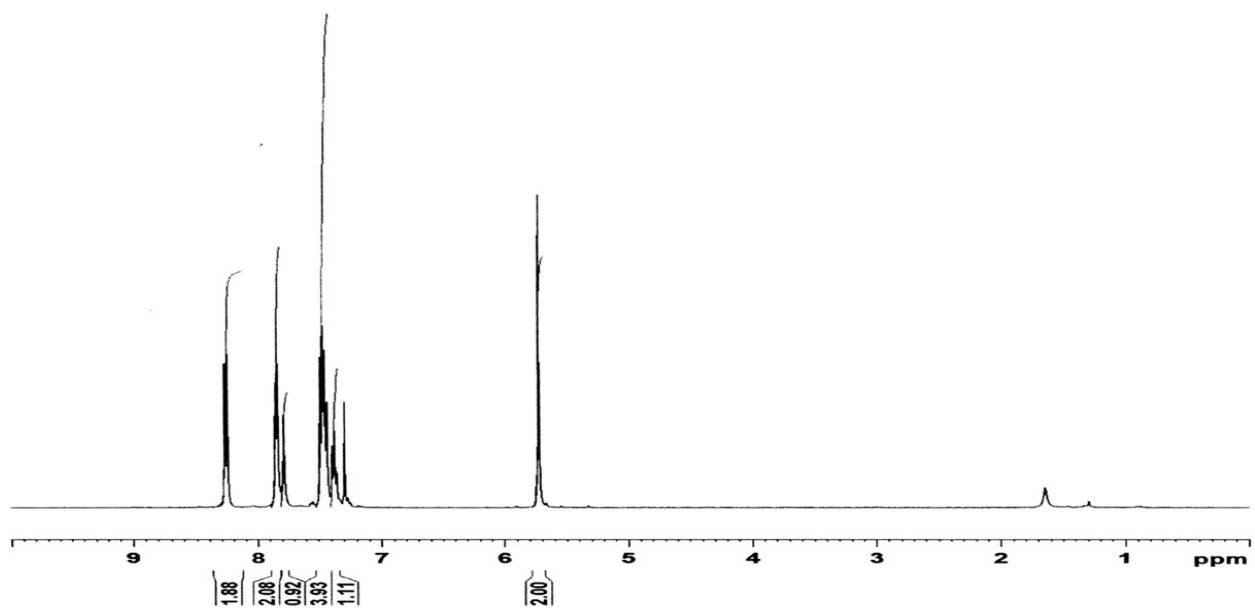

**Figure S9.** 1-(4-Nitrobenzyl)-4-phenyl-1H-1,2,3-triazole

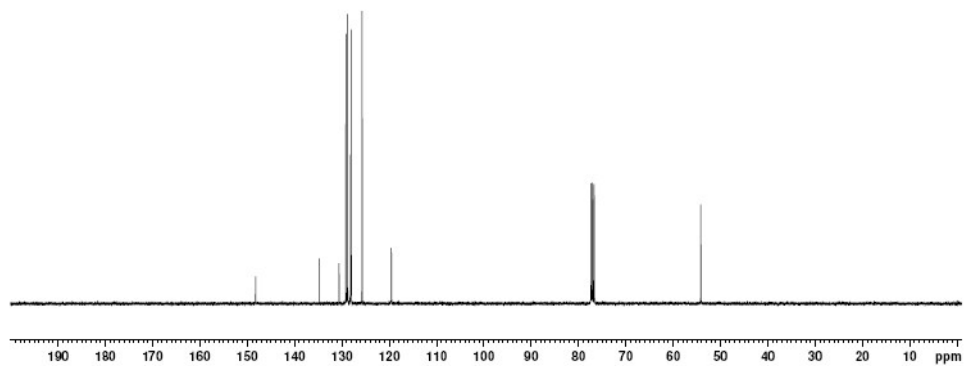

**Figure S10.** <sup>13</sup>C NMR spectrum of 1-benzyl-4-phenyl-1H-1,2,3-triazole

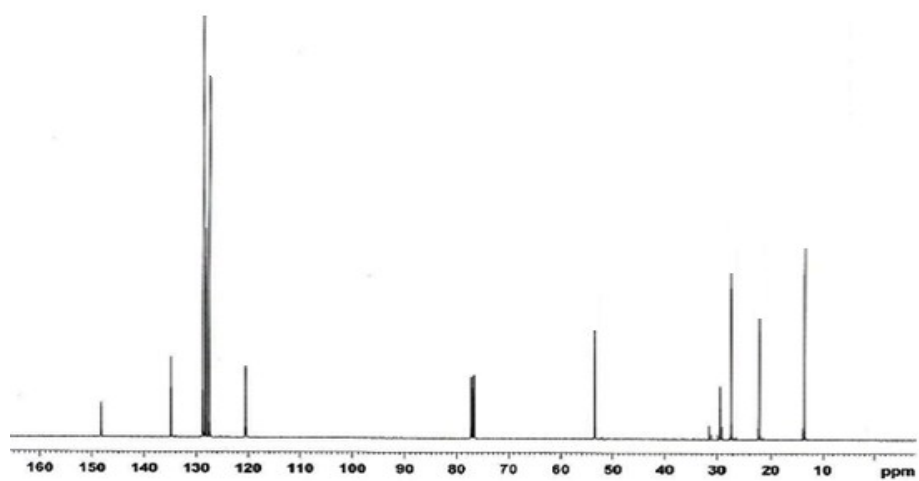

**Figure S11.** <sup>13</sup>C NMR spectrum of 1-Benzyl-4-propyl-1H-1,2,3-triazole

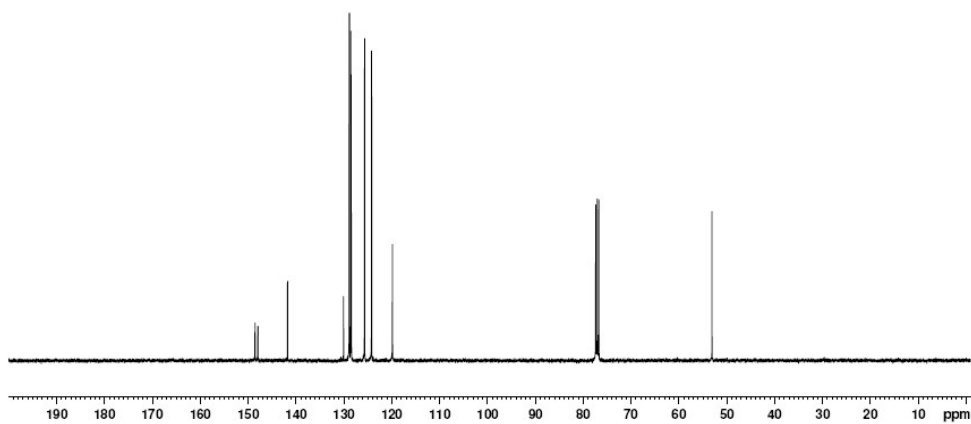

**Figure S12.** <sup>13</sup>C NMR spectrum of 1-(4-nitrobenzyl)-4-phenyl-1H-1,2,3-triazole

## References

1. M. R. Farsani, B. Yadollahi, H. A. Rudbari, A. Amini, T. Caradoc-Davis and J. R. Price, *Inorg. Chem. Commun.*, 2014, **43**, 39-44.
2. R. Contant, *Inorg. Synth.*, 1990, **27**, 110-111.
3. R. G. Finke, M. W. Droege and P. J. Domaille, *Inorg. Chem.*, 1987, **26**, 3886-3896.
4. K. Yamaguchi, K. Kamata, S. Yamaguchi, M. Kotani and N. Mizuno, *J. Catal.*, 2008, **258**, 121-30.
5. J. Liu, F. Ortéga, P. Sethuraman, D. E. Katsoulis, C. E. Costello and M. T. Pope, *J. Chem. Soc., Dalton Trans.*, 1992, 1901-1906.
6. S. S. Mal and U. Kortz, *Angew. Chem. Int. Ed.*, 2005, **44**, 3777-3780
7. C. Shao, X. Wang, Q. Zhang, S. Luo, J. Zhao and Y. Hu, *J. Org. Chem.*, 2011, **76**, 6832-6836.
8. X. Meng, X. Xu, T. Gao and B. Chen, *Eur. J. Org. Chem.*, 2010, 5409-5414.
9. S. Chassaing, A. S. S. Sido, A. Alix, M. Kumarraja, P. Pale and J. Sommer, *Chem. Eur. J.*, 2008, **14**, 6713-6721.
10. A. N. Prasad, B. M. Reddy, E-Y. Jeong and S-E. Park, *RSC Adv.*, 2014, **4**, 29772-781.
